1 **Differential Cetacea Circadian Rhythmicity is associated with the molecular erosion of**  
2 **Cortistatin**

3

4 Raul Valente<sup>1,2\*</sup>, Luís Q. Alves<sup>1\*</sup>, Matilde Nabais<sup>1</sup>, Filipe Alves<sup>3,4</sup>, Isabel Sousa-Pinto<sup>1,2</sup>,  
5 Raquel Ruivo<sup>1\*</sup>, and L. Filipe C. Castro<sup>1,2\*</sup>

6 <sup>1</sup>CIIMAR/CIMAR - Interdisciplinary Centre of Marine and Environmental Research, U.Porto,  
7 Portugal

8 <sup>2</sup>FCUP - Faculty of Sciences, Department of Biology, U.Porto, Portugal

9 <sup>3</sup>MARE - Marine and Environmental Sciences Centre, ARDITI, Madeira, Portugal

10 <sup>4</sup>OOM - Oceanic Observatory of Madeira, Funchal, Portugal

11

12 • These authors contributed equally

13

14 \*Corresponding author:

15 L. Filipe C. Castro and Raquel Ruivo

16 CIIMAR/CIMAR U. Porto, Av. General Norton de Matos s/n, 4450-208 Matosinhos, Portugal.

17 Tel.: +351 223 401 831

18 Email: [filipe.castro@ciimar.up.pt](mailto:filipe.castro@ciimar.up.pt); [ruivo.raquel@gmail.com](mailto:ruivo.raquel@gmail.com)

19

20

21

22

23

24

25

26

27

28

29

30

31

32

33

34

35

36

37 **Abstract**

38 The ancestors of Cetacea underwent profound morpho-physiological alterations. By displaying  
39 an exclusive aquatic existence, cetaceans evolved unique patterns of locomotor activity, vigilant  
40 behaviour, thermoregulation and circadian rhythmicity. Deciphering the molecular landscape  
41 governing many of these adaptations is key to understand the evolution of phenotypes. Here, we  
42 investigate Cortistatin (*CORT*), a neuropeptide displaying an important role mammalian  
43 biorhythm regulation. This neuropeptide is a known neuroendocrine factor, stimulating slow-  
44 wave sleep, but also involved in the regulation of energy metabolism and hypomotility  
45 inducement. We assessed the functional status of *CORT* in 139 mammalian genomes (25  
46 orders), including 30 species of Cetacea. Our findings indicate that cetaceans and other  
47 mammals with atypical biorhythms, thermal constraints and/or energy metabolism, have  
48 accumulated deleterious mutations in *CORT*. In light of the pleiotropic action of this  
49 neuropeptide, we suggest that this inactivation contributed to a plethora of phenotypic  
50 adjustments to accommodate adaptive solutions to specific ecological niches.

51

52

53

54

55

56

57

58

59

60

61

62

63

64

65

66

67

68

69

70

71

72

73

74 **Main text**

75 Habitat transitions nourish the emergence of novel phenotypes. In this context, Cetacea (whales  
76 and dolphins) are a particularly fascinating group to understand the genomic signatures of  
77 adaptation to radical shifts, given their land-to-water evolutionary history and their exclusive  
78 reliance on aquatic ecosystems (e.g. McGowen et al. 2014; Huelsmann et al. 2019; McGowen et  
79 al. 2020). Specifically, gene loss events, including complete gene absence or sequence gene  
80 erosion (Albalat and Cañestro, 2016), seem to stand out as significant triggers of phenotypic  
81 adaptations within this group: as reported for disparate processes such as skin remodelling,  
82 immunity and inflammation, deep-diving induced hypoxia, blood pressure maintenance, or even  
83 circadian rhythmicity and sleep/vigilance behaviours (e.g. Braun et al. 2015; Hecker et al. 2017;  
84 Lopes-Marques et al. 2018, 2019a, 2019b, 2019c; Alves et al. 2019; Ehrlich et al., 2019;  
85 Huelsmann et al. 2019). Among these, circadian and sleep/vigilance behaviours are particularly  
86 challenging since cetaceans require occasional surfacing to breathe. Importantly, mammalian  
87 sleep generally prompts several physiological adjustments, which conflict with a fully aquatic  
88 lifestyle, including hypomotility, sleep thermoregulation or decreased blood pressure (Giglio et  
89 al. 2007; Alves et al. 2019). To offset these constraints, Cetacea exhibit distinctive biological  
90 rhythms, allowing the maintenance of vigilant states over long periods of time (Ridgway et al.  
91 2006; Branstetter et al. 2012), along with lateralized sleep (Lyamin et al. 2008), or even  
92 uninterrupted activity as observed in Delphinidae neonates and mothers (Lyamin et al. 2005;  
93 Siegel 2005). In agreement, recent studies have highlighted gene loss signatures related with the  
94 maintenance of such an unusual form of mammalian sleep/vigilance behaviours, notably  
95 regarding the synthesis and signalling of melatonin, a potent modulator of circadian  
96 rhythmicity, affecting multiple physiological and behavioural processes such as sleep  
97 entrainment, locomotor activity or thermoregulation (Huelsmann et al. 2019; Lopes-Marques  
98 2019c). Here, we investigate Cortistatin (*CORT*), a cyclic neuropeptide which plays an  
99 important role in sleep physiology (de Lecea et al. 1996). Belonging to the somatostatin (SST)  
100 neuropeptide family, *CORT* was shown to have sleep-promoting properties, stimulating slow-  
101 wave sleep, as well as to induce hypomotility (Spier and de Lecea 2000) (Figure 1). Moreover,  
102 the diversification of roles attributed to *CORT* also includes regulation of endocrine  
103 metabolism, immunomodulation, inflammatory responses, pain perception and cardiovascular  
104 protection (Deghengi et al. 2001; Robas et al. 2003; Broglio et al. 2007; Gonzalez-Rey et al.  
105 2015; Liang et al. 2019). Despite sharing similarities with SST, such as peptide structure,  
106 resulting from proteolytic cleavage, and binding affinity towards SST receptors, *CORT*  
107 generally yields antagonizing effects when compared to SST (Spier and de Lecea 2000; Broglio  
108 et al. 2007). In this context, we sought to characterize the functional status of *CORT* genes in  
109 Cetacea, and other mammalian lineages, to determine whether gene inactivation events have  
110 taken place, as previously reported for other genes (e.g. Kim et al. 2014; Shinde et al. 2019). We

111 began by inspecting the open reading frame (ORF) of *CORT* in a selected sub-set of Cetacea  
112 species using PseudoIndex (Alves et al. 2020). This user assistant metric built into the  
113 PseudoChecker pipeline rapidly estimates the erosion condition of the tested genes - discrete  
114 scale from 0 (functional) to 5 (pseudogenized) (Alves et al. 2020). All analysed species revealed  
115 a PseudoIndex equal to 5 within Odontoceti species, except for *Lipotes vexillifer* and  
116 *Delphinapterus leucas*, which displayed a PseudoIndex of 2 and 3 respectively (Supplementary  
117 File 1). This analysis suggested that the ORF of *CORT* includes inactivating mutations. Thus,  
118 we next performed a manual and exhaustive *CORT* sequence analysis in a larger phylogenetic  
119 collection of species and included an additional curated validation step of the mutational  
120 evidence. In detail, genomic *CORT* sequences from 139 terrestrial and aquatic mammalian  
121 species (Supplementary File 2), containing 30 Cetacea (9 Mysticeti and 21 Odontoceti), were  
122 collected from available genomes and manually annotated using *Bos taurus* (phylogenetically  
123 related to Cetacea (McGowen et al. 2019)) or *Homo sapiens* (for other mammals) *CORT* coding  
124 sequences (CDS) as a reference (Lopes-Marques et al. 2017). Predicted ORFs were screened for  
125 disrupting mutations, with these being further validated (when possible) using data from at least  
126 2 independent Sequence Read Archive (SRA) genomic projects or from 2 distinct individuals  
127 (Lopes-Marques et al. 2019a). Gene orthology between Cetacea species and *B. taurus* was  
128 validated through synteny analysis, which essentially revealed *locus* conservation between  
129 species (Supplementary File 3).

130

### 131 ***CORT* exhibits a conserved premature stop codon in Delphinoidea**

132 In Odontoceti (toothed whales and dolphins), all Delphinoidea, including *Delphinidae*  
133 (dolphins, e.g. *Tursiops truncatus*, *Orcinus orca*), *Phocoenidae* (porpoises, e.g. *Phocoena*  
134 *phocoena*), and *Monodontidae* (narwhal, *Monodon monoceros*, and beluga whale,  
135 *Delphinapterus leucas*), exhibited a conserved stop codon mutation in exon 1 (Figure 1), with  
136 the exception of *O. orca*, which displays an arginine codon in the same position (CGA). Yet,  
137 given the striking conservation of the premature stop codon across analysed Delphinoidea, and  
138 the single nucleotide difference between both codons, the *Orca* exception likely represents a  
139 case of mutational reversion (Stop>Arg, TGA>CGA) (Rosenberg 2001). Nonetheless, in  
140 addition to the premature stop codon, other mutations were identified, confirming the erosion of  
141 *CORT* in *O. orca*, such as frameshifts in exon 1 (31 nucleotide deletion and 2 nucleotide  
142 insertion), conserved in all *Delphinidae* (Figure 1). In *O. orca* and Delphininae species  
143 (*Tursiops* and *Sousa*), exon 2 also presented a frameshift mutation (1 nucleotide deletion), a  
144 pattern not consistent with the species branching tree topology (McGowen et al., 2019).  
145 Additionally, deleterious mutations were also found across all members of *Phocoenidae* and  
146 *Monodontidae* (described in Supplementary File 4). Detected mutations were further validated  
147 by independent SRAs in all species, when available (Supplementary File 5).

148

149 To further scrutinize the functional condition of *CORT*, we searched for transcriptional evidence  
150 of this gene in *Globicephala melas*, *O. orca* and *D. leucas* by investigating available brain  
151 RNA-Seq projects at the SRA database (Krüger et al. 2020). The collected mRNA reads were  
152 mapped against the corresponding annotated gene and classified as spliced reads (reads partially  
153 covering two exons), exon-intron reads (unspliced reads) and exonic reads (reads containing  
154 only data from a single exon) (Lopes-Marques et al. 2019b). Briefly, we observed a  
155 substantially high proportion of exon-intron reads *versus* spliced reads in stark contrast to the  
156 pattern found in cow (positive control) (Figure 2). In addition, we were able to identify at least  
157 one premature stop codon in the transcripts of all analysed species (Supplementary file 6),  
158 further validating the predicted ORF-abolishing mutations.

159

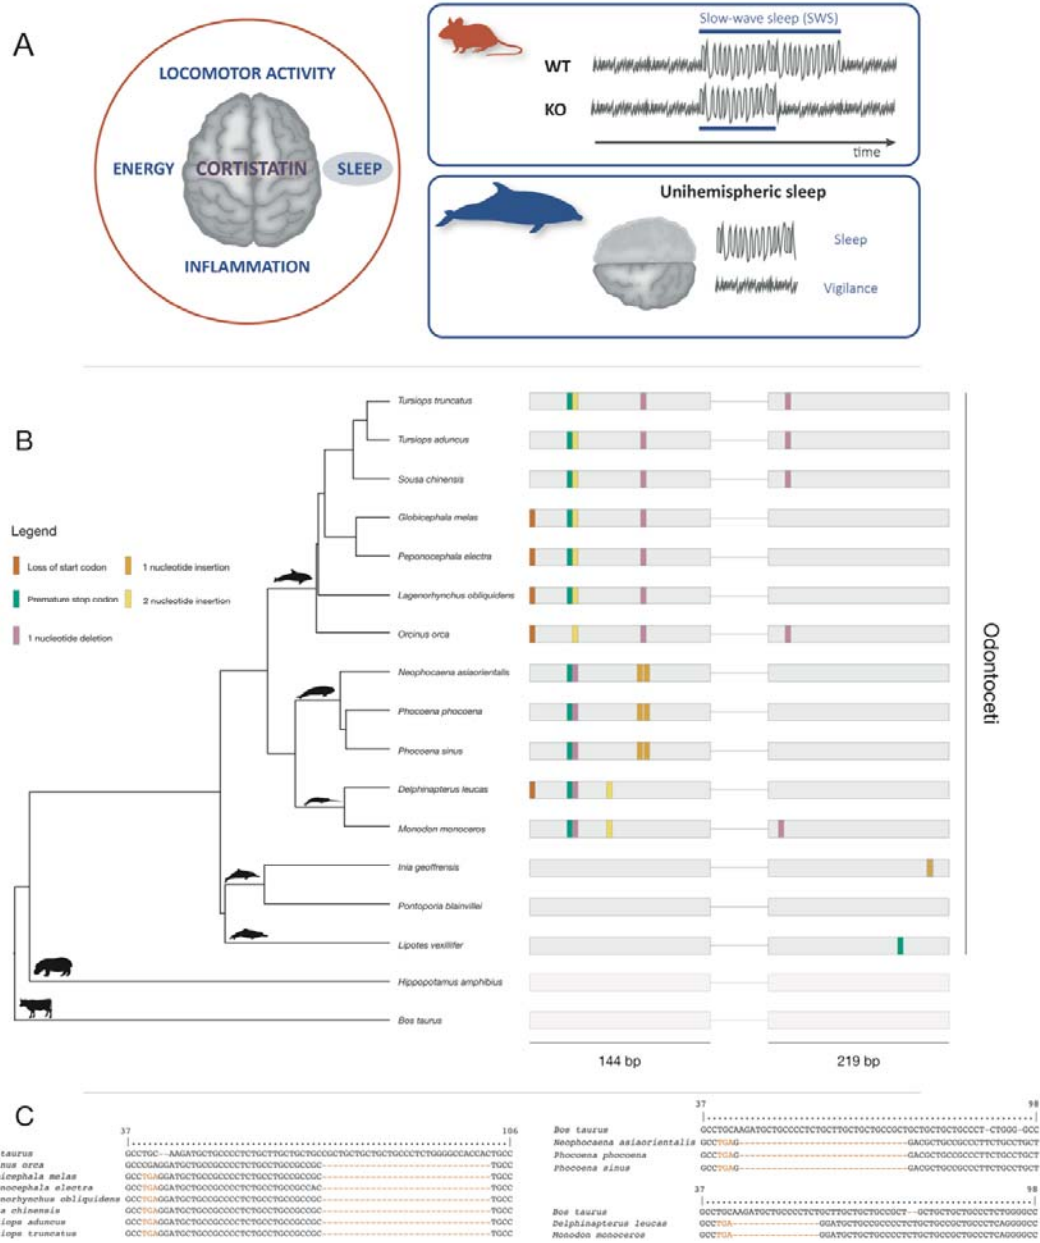

160  
161 Figure 1: Distinct physiological roles attributed to *CORT*, effect of *CORT* knockout mice in slow wave sleep time  
162 and cetacean idiosyncratic sleeping in the form of lateralized sleep behaviour (A). Mutational landscape of the *CORT*  
163 gene in several Odontoceti, *H. amphibius* and *B. taurus* and location of identified mutations (B). Phylogenetic  
164 relationships are derived from McGowen et al. (2020). Example of *CORT* open reading frame (ORF) inactivating  
165 mutations concerning *Delphinidae*, *Phocoenidae* and *Monodontidae* clades (C). Numbers above characters represent  
166 the alignment position index. Silhouettes were recovered from Phylopic (<http://phylopic.org>).  
167

### 168 Divergent patterns of functional inactivation are observed in river dolphins

169 River dolphins represent a polyphyletic group within Odontoceti, including species such as  
170 *Lipotes vexillifer*, *Pontoporia blainvillei*, *Inia geoffrensis* or *Platanista gangetica*. Among these,  
171 *L. vexillifer* showed a premature stop codon in exon 2, *P. gangetica* presented frameshift

172 mutations in both exons (31 nucleotide deletion in exon 1 and 4 nucleotide insertion in exon 2)  
173 and *I. geoffrensis* displays an indel in exon 2 (Supplementary File 4). Given that no SRAs are  
174 available for these species, SRA validation was not performed. Regarding *P. blainvillei*, on the  
175 other hand, no ORF disrupting mutations were found. Yet, further sequence analysis revealed  
176 amino acid changes that possibly impair canonical peptide function (Supplementary File 7).  
177 *CORT*, similarly to *SST*, contains a carboxyl-terminal FWKT (Phe-Trp-Lys-Thr) tetramer,  
178 essential for binding to *SST* receptors (de Lecea et al. 1996; Spier and de Lecea 2000). Despite  
179 its strict conservation across mammals, amino acid substitutions are observed in *P. blainvillei*,  
180 thus suggesting that, in this species, *SST* receptor binding is possibly impaired (Supplementary  
181 File 7).

182

### 183 **Variable disruption patterns are observed in the Odontoceti Ziphiidae, Physeteroidea, as** 184 **well as in Mysticeti**

185 In *Ziphiidae* (*Mesoplodon bidens* and *Ziphius cavirostris*) or *Kogia breviceps* (pygmy sperm  
186 whale), no ORF disrupting mutations, nor radical amino acid replacements, were detected  
187 (Supplementary File 4). On the other hand, *Physeter macrocephalus* presented a single  
188 frameshift mutation in exon 2, validated by SRA (Supplementary file 4). In Mysticeti,  
189 *Balaenoptera acutorostrata* presented a premature stop codon in exon 2 (Supplementary File 4).  
190 Also, a 22-nucleotide deletion was detected in exon 1 of *Eschrichtius robustus*, *Megaptera*  
191 *novaeangliae* and *Balaenoptera musculus*, while for *Balaenoptera physalus* we identified three  
192 indel mutations also in exon 1. These mutations were validated by SRA searches in *B.*  
193 *acutorostrata* and *E. robustus* (Supplementary File 5). Besides these ORF-disrupting mutations,  
194 a conserved loss of start codon (ACG - Thr) was also detected for the full set of examined  
195 Mysticeti species, except for *B. acutorostrata*. However, an ATG (methionine) codon could be  
196 found downstream from the threonine in the same translational reading frame (Supplementary  
197 File 4). Thus, in species presenting no more disruptive mutations - namely in *Eubalaena*  
198 *glacialis*, *Eubalaena japonica*, *Balaenoptera bonaerensis* and *Balaenoptera edeni*, we cannot  
199 rule out the possibility of a functional *CORT* gene. In *Balaena mysticetus*, the fragmentation of  
200 the genomic region (Ns) corresponding to exon 2 from *CORT* impeded us to infer the coding  
201 status in this species. Additionally, for *B. acutorostrata*, mapping of transcriptional reads from a  
202 brain RNA-Seq project yielded a high proportion of exon-intron reads versus spliced reads  
203 (Figure 2) and further corroborated the presence of the premature stop codon in exon 2. For the  
204 remaining analysed species, no deleterious mutations were unequivocally found. Nonetheless,  
205 besides ORF disruptive mutations, other processes can lead to the non-functionalization of a  
206 gene: i.e. lack of transcription, RNA decay, or even protein degradation (e.g. Sadier et al. 2018).  
207 Yet, we were unable to verify the transcriptomic profile of *CORT* in these species given the  
208 absence of adequate transcriptomic data.



209

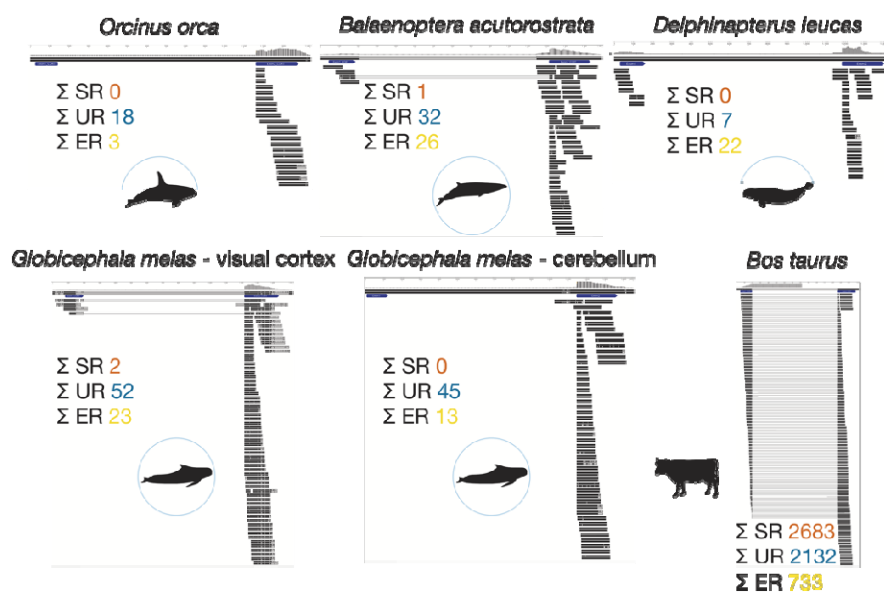

210

211 **Figure 2:** Gene expression of *CORT* across represented Cetacea species: mapping of the NCBI Sequence Read  
212 Archive (SRA) brain RNA-Seq reads (black) for each of the 5 represented species against the corresponding *CORT*  
213 annotated gene (in blue). Overall count of RNA-Seq mapped reads for each species is also represented. Reads are  
214 classified into spliced reads (SR), exon-intron reads (UR), and exonic reads (ER).

215

## 216 Selection analysis

217 To find evidence of some relaxation of purifying selection typically associated with events of  
218 gene pseudogenization, RELAX analysis using the HyPhy package was performed (Pond et al.  
219 2005; Wertheim et al. 2014). We used the predicted *CORT* sequences from 43 species,  
220 comprising all Cetartiodactyla species analysed in this study (Supplementary File 2). As  
221 RELAX compares a background set of species with a foreground set of species over a  
222 hypothesis-testing framework, we targeted the ancestral branch of the cetacean lineages, using  
223 the branches from all non-cetacean species as a reference. Although no significant  
224 intensification or relaxation has been found (Supplementary File 8 – Table S1), it can be seen  
225 through the general descriptive model (Supplementary File 8 – Figure S1) that the ancestor of  
226 all cetaceans experienced relaxed selection ( $k < 1$ ), coinciding with substantial changes in  
227 *CORT* amino acidic composition. Moreover, we detected signs of intermittent relaxed selection  
228 ( $k < 1$ ) within various cetacean lineages, which could result from differences in gene  
229 length/composition across branches. This could be due to an intensification of  
230 positive/diversifying selection prior to the observed pseudogenization in the terminal cetacean  
231 branches.

232

233



234

### 235 **Episodes of *CORT* ORF-disruption are found in other mammal species**

236 We next interrogated the genomes of other mammalian species. The implemented assessment  
237 revealed a number of ORF-disrupting mutations in 14 species (Supplementary File 9). For  
238 example, the sequence of *CORT* in *Ursus maritimus* (polar bear) revealed a single nucleotide  
239 deletion in exon 2 and in *Procavia capensis* (rock hyrax) a premature stop codon in exon 2  
240 (confirmed by SRA search in *U. maritimus*; Supplementary File 10); in the Pholidota *Manis*  
241 *javanica* and *Manis pentadactyla* (pangolins), a shared frameshift mutation in exon 1 and a  
242 premature stop codon was identified (validated by SRA in *M. javanica*; Supplementary File 10).  
243 In the Carnivora *Canis lupus* (wolf) and *Lycaon pictus* (African wild dog), conserved single  
244 nucleotide insertions were found in exon 2, whereas *Felis catus* (cat) and *Acynonix jubatus*  
245 (cheetah), exhibit a conserved 2 nucleotide insertion in exon 1, all validated by independent  
246 sequencing reads. Other examples include *Dasyopus novemcinctus* (nine banded armadillo) with  
247 an indel and a premature stop codon in exon 2, *Choleopus hoffmanni* (Hoffmann's two-toed  
248 sloth) with single nucleotide insertions and deletions in both exons, and *Condylura cristata*  
249 (star-nosed mole) for which exon 2 was not found.

250

### 251 **Metabolic Homeostasis and Circadian rhythmicity**

252 Our study provides clear evidence for the dismantling of *CORT* gene sequence within most  
253 Cetacea and in several other mammalian lineages. Curiously, various of these species display  
254 particular biological rhythms and/or labile body temperatures: the hibernating polar bear; the  
255 subterranean star-nosed mole; nocturnal species with variable and relatively low body  
256 temperatures such as the two-toed sloth, the nine banded armadillo, pangolins, or the rock hyrax  
257 that undergoes nocturnal hypothermia (Ralph 1975; Brown and Downs 2007; Ware et al. 2013).  
258 Thus, it is plausible to hypothesize that, in these species, *CORT* inactivation is related with  
259 changes in circadian rhythmicity, affecting sleep/vigilance behaviours, body temperature  
260 maintenance and/or activity patterns. Interestingly, these species also display some degree of  
261 reduction or even complete atrophy of the pineal gland, the dominant organ for melatonin  
262 synthesis (Pévet 2002). In Cetacea, constituting a group with a remarkably altered sleep  
263 physiology, *CORT* pseudogenization possibly paralleled additional losses, notably regarding the  
264 melatonin synthesis and signalling genes (Lopes-Marques et al. 2019c; Huelsmann et al. 2019).  
265 Unexpectedly, we also found robust evidence supporting *CORT* pseudogenization in some  
266 Carnivora species, particularly felids and canids. However, and in addition to SST receptors,  
267 *CORT* was also suggested to bind other G-protein-coupled receptors such as the ghrelin receptor  
268 growth hormone secretagogue receptor type 1a (GHSR-1a), which participates in energy  
269 homeostasis regulation: namely in the control of food intake and energy metabolism  
270 (Deghenghi et al. 2001; Broglio et al. 2007). Mice lacking *CORT* gene showed alterations in

271 whole-body metabolism, in a gender-dependent manner, notably resulting in the increase of  
272 acylated ghrelin levels in female, or higher glucose levels and insulin resistance in males  
273 (Córdoba-Chacón et al. 2011; Luque et al. 2016). In addition, *CORT* action was also proposed  
274 to be conditioned by the underlying metabolic status (i.e. fasting or obesity) (Luque et al. 2016).  
275 These observations are in agreement with the metabolic profile observed in felids, associated  
276 with a low-carbohydrate consumption and deficit in hepatic glucokinase activity, yielding  
277 fasting hyperglycaemia and insulin resistance (Schermerhorn 2013). Both hyperglycaemia and  
278 insulin resistance were also reported in dolphins, also displaying reduced carbohydrate intake  
279 (Schermerhorn 2013). Overall, our results put forward that the evolutionary loss of *CORT*,  
280 along with additional genomic and phenotypic signatures, paralleled the adjustment of circadian  
281 rhythmicity and energy homeostasis to accommodate adaptations to specific ecological niches  
282 and life-history traits.

283

#### 284 **Acknowledgments**

285 We acknowledge the various genome consortiums for sequencing and assembling the genomes.

286

#### 287 **Funding**

288 This research was funded by COMPETE 2020, Portugal 2020 and the European Union through  
289 the ERDF, grant number 031342, and by FCT through national funds (PTDC/CTA-  
290 AMB/31342/2017). R.V. is funded by Portuguese national funding agency for science, research  
291 and technology (FCT) under the grant SFRH/BD/144786/2019. F.A. is funded by Madeira's  
292 Regional Agency for the Development of Research, Technology and Innovation (ARDITI)  
293 throughout the project M1420-09-5369-FSE-000001.

294

295 Conflicts of Interest: The authors declare no conflict of interest.

296

#### 297 **References**

298

299 Alves LQ, Alves J, Ribeiro R, Ruivo R, Castro LFC. 2019. The dopamine receptor D5 gene  
300 shows signs of independent erosion in toothed and baleen whales. *PeerJ* 7:e7758.

301

302 Alves LQ, Ruivo R, Fonseca MM, Lopes-Marques M, Ribeiro P, Castro LFC. Forthcoming  
303 2020. *PseudoChecker*: An integrated online platform for gene inactivation inference. *Nucleic  
304 Acid Res.*

305

306 Branstetter BK, Finneran JJ, Fletcher EA, Weisman BC, Ridgway SH. 2012. Dolphins can  
307 maintain vigilant behavior through echolocation for 15 days. *PLoS One* 7:e47478.

308

309 Braun BA, Marcovitz A, Camp JG, Jia R, Bejerano G. 2015. Mx1 and Mx2 key antiviral  
310 proteins are surprisingly lost in toothed whales. *Proc Natl Acad Sci USA*. 11226:8036–8040.

311

312 Broglio F, Papotti M, Muccioli G, Ghigo E. 2007. Brain–gut communication: cortistatin,  
313 somatostatin and ghrelin. *Trends Endocrinol Metab*. 18:246–251.

314

315 Brown KJ, Downs CT. 2007. Basking behaviour in the rock hyrax (*Procavia capensis*) during  
316 winter. *Afr. Zool*. 42:70–79.

317

318 Albalat R, Cañestro C. 2016. Evolution by gene loss. *Nat Rev Genet*. 17:379-91.

319

320 Córdoba-Chacón J, Gahete MD, Pozo-Salas AI, Martínez-Fuentes AJ, de Lecea L, Gracia-  
321 Navarro F, Kineman RD, Castano JP, Luque RM. 2011. Cortistatin is not a somatostatin  
322 analogue but stimulates prolactin release and inhibits GH and ACTH in a gender-dependent  
323 fashion: potential role of ghrelin. *Endocrinology* 152:4800–4812.

324

325 Deghenghi R, Papotti M, Ghigo E, Muccioli G. 2001. Cortistatin, but not somatostatin, binds to  
326 growth hormone secretagogue (GHS) receptors of human pituitary gland. *J Endocrinol*  
327 *Invest*. 24: RC1-3.

328

329 de Lecea L, Criado JR, Prospero-Garcia Ó, Gautvik KM, Schweitzer P, Danielson PE, Dunlop  
330 CLM, Siggins GR, Henriksen SJ, Sutcliffe JG. 1996. A cortical neuropeptide with neuronal  
331 depressant and sleep-modulating properties. *Nature* 381:242–245.

332

333 Dunkin RC, McLellan WA, Blum JE, Pabst D. 2005. The ontogenetic changes in the thermal  
334 properties of blubber from Atlantic bottlenose dolphin *Tursiops truncatus*. *J Exp Biol*.  
335 208:1469–1480.

336

337 Ehrlich F, Fischer H, Langbein L, Praetzel-Wunder S, Ebner B, Figlak K, Weissenbacher A,  
338 Sipos W, Tschachler E, Eckhart L. 2019. Differential Evolution of the Epidermal Keratin  
339 Cytoskeleton in Terrestrial and Aquatic Mammals. *Mol Biol Evol*. 36:328-340.

340

341 Giglio P, Lane JT, Barkoukis TJ, Dumitru I. 2007. Sleep physiology. In: Barkoukis TJ, Avidan  
342 AY, editors. *Review of Sleep Medicine*. Second Edition. Philadelphia: Butterworth-Heinemann,  
343 p. 29–41.

344

- 345 Gonzalez-Rey E, Pedreno M, Delgado-Maroto V, Souza-Moreira L, Delgado M. 2015.  
346 Lulling immunity, pain, and stress to sleep with cortistatin. *Ann NY Acad Sci.* 1351:89–98.  
347
- 348 Hecker N, Sharma V, Hiller M. 2017. Transition to an aquatic habitat permitted the repeated  
349 loss of the pleiotropic KLK8 gene in mammals. *Genome Biol Evol.* 911:3179–3188.  
350
- 351 Huelsmann M, Hecker N, Springer MS, Gatesy J, Sharma V, Hiller M. 2019. Genes lost during  
352 the transition from land to water in cetaceans highlight genomic changes associated with aquatic  
353 adaptations. *Sci Adv.* 5:eaaw6671.  
354
- 355 Krüger A, Fabrizius A, Mikkelsen B, Siebert U, Folkow LP, Burmester T. 2020. Transcriptome  
356 analysis reveals a high aerobic capacity in the whale brain. *Comp Biochem Physiol A Mol Integr*  
357 *Physiol.* 240:110593. doi: 10.1016/j.cbpa.2019.110593.  
358
- 359 Liang J, Bai Y, Chen W, Fu Y, Liu Y, Yin X. 2019. Cortistatin, a novel cardiovascular  
360 protective peptide. *Cardiovasc Diagn Ther.* 9(4):394–399. doi:10.21037/cdt.2018.12.08  
361
- 362 Lyamin O, Pryaslova J, Lance V, Siegel J. 2005. Continuous activity in cetaceans after  
363 birth. *Nature* 435:1177. <https://doi.org/10.1038/4351177a>  
364
- 365 Lyamin OI, Manger PR, Ridgway SH, Mukhametov LM, Siegel JM. 2008. Cetacean sleep: an  
366 unusual form of mammalian sleep. *Neurosci Biobehav Rev.* 32:1451–1484. doi:  
367 10.1016/j.neubiorev.2008.05.023  
368
- 369 Lopes-Marques M, Ruivo R, Fonseca E, Teixeira A, Castro LFC. 2017. Unusual loss of  
370 chymosin in mammalian lineages parallels neo-natal immune transfer strategies. *Mol*  
371 *Phylogenet Evol.* 116:78–86. doi: 10.1016/j.ympev.2017.08.014  
372
- 373 Lopes-Marques M, Machado AM, Barbosa S, Fonseca MM, Ruivo R, Castro LFC. 2018.  
374 Cetacea are natural knockouts for IL20. *Immunogenetics* 70:681–687.  
375 <https://doi.org/10.1007/s00251-018-1071-5>  
376
- 377 Lopes-Marques M, Machado AM, Alves LQ, Fonseca MM, Barbosa S, Sinding M-HS,  
378 Rasmussen HM, Iversen MR, Bertelsen MF, Campos PF, da Fonseca R, Ruivo R, Castro LFC.  
379 2019a. Complete Inactivation of Sebum-Producing Genes Parallels the Loss of Sebaceous  
380 Glands in Cetacea. *Mol Biol Evol.* 36(6):1270–1280. <https://doi.org/10.1093/molbev/msz068>  
381

- 382 Lopes-Marques M, Alves LQ, Fonseca MM, Secci-Petretto G, Machado AM, Ruivo R, Castro  
383 L.F.C. 2019b. Convergent inactivation of the skin-specific CC motif chemokine ligand 27 in  
384 mammalian evolution. *Immunogenetics* 71(5-6):363-372.  
385
- 386 Lopes-Marques M, Ruivo R, Alves LQ, Sousa N, Machado AM, Castro LFC. 2019c. The  
387 Singularity of Cetacea behavior parallels the complete inactivation of melatonin gene modules.  
388 *Genes* 10:121. <https://doi.org/10.3390/genes10020121>  
389
- 390 Luque RM, Córdoba-Chacón J, Pozo-Salas AI, Porteiro B, de Lecea L, Nogueiras R, Gahete  
391 MD, Castaño JP. 2016. Obesity- and gender-dependent role of endogenous somatostatin and  
392 cortistatin in the regulation of endocrine and metabolic homeostasis in mice. *Sci Report*.  
393 6:37992.  
394
- 395 McGowen MR, Gatesy J, Wildman DE. 2014. Molecular evolution tracks macroevolutionary  
396 transitions in Cetacea. *Trends Ecol Evol*. 29:336–346.  
397
- 398 McGowen MR, Tsagkogeorga G, Álvarez-Carretero S, dos Reis M, Struebig M, Deaville R,  
399 Jepson PD, Jarman S, Polanowski A, Morin PA, Rossiter SJ. 2019. Phylogenomic resolution of  
400 the cetacean tree of life using target sequence capture. *Syst. Biol.* Advance Access.  
401 <https://doi.org/10.1093/sysbio/syz068>  
402
- 403 McGowen MR, Tsagkogeorga G, Williamson J, Morin PA, Rossiter SJ. 2020. Positive selection  
404 and inactivation in the vision and hearing genes of cetaceans. *Mol Biol Evol*.  
405 msaa070. <https://doi.org/10.1093/molbev/msaa070>  
406
- 407 Pévet P. 2002. Melatonin. *Dialogues Clin Neurosci*. 4:57–72.  
408
- 409 Pond SLK, Frost SDW, Muse SV. 2005. HyPhy: hypothesis testing using phylogenies.  
410 *Bioinformatics* 21:676–679.  
411
- 412 Ralph CL. 1975. The pineal gland and geographical distribution of animals. *Int J Biometeorol*.  
413 19:289–303.  
414
- 415 Ridgway S, Carder D, Finneran J, Keogh M, Kamolnick T, Todd M, Goldblatt A. 2006.  
416 Dolphin continuous auditory vigilance for five days. *J Exp Biol*. 209:3621–3628.  
417

- 418 Robas N, Mead E, Fidock M. 2003. MrgX2 is a high potency cortistatin receptor expressed in  
419 dorsal root ganglion. *J Biol Chem.* 278:44400–44404.  
420
- 421 Rosenberg SM. 2001. Reverse Mutation. In Brenner S, Miller JH, editors. Encyclopedia of  
422 Genetics. San Diego: Academic Press. p. 1709-1710.  
423
- 424 Sadier A, Davies KT, Yohe LR, Yun K, Donat P, Hedrick BP, Dumont ER, Davalos LM,  
425 Rossiter SJ, Sears KE. 2018. Multifactorial processes underlie parallel opsin loss in neotropical  
426 bats. *Elife* 7.  
427
- 428 Schermerhorn T. 2013. Normal glucose metabolism in carnivores overlaps with diabetes  
429 pathology in non-carnivores. *Front Endocrinol. (Lausanne)* 4:188.  
430
- 431 Siegel JM. 2005. Clues to the functions of mammalian sleep. *Nature* 437:1264–71.  
432
- 433 Spier AD, de Lecea L. 2000. Cortistatin: a member of the somatostatin neuropeptide family  
434 with distinct physiological functions. *Brain Res Rev.* 33:228–241.  
435
- 436 Ware JV, Rode KD, Robbins CT, Leise T, Weil CR, Jansen HT. 2020. The Clock Keeps  
437 Ticking: Circadian Rhythms of Free-Ranging Polar Bears. *J Biol Rhythm.* 35(2):180-194.  
438
- 439 Wertheim JO, Murrell B, Smith MD, Kosakovsky Pond SL, Scheffler K. 2015. RELAX:  
440 detecting relaxed selection in a phylogenetic framework. *Mol Biol Evol.* 32:820-832.
